# Supplementary material for: Characterizing the Inflammatory Microenvironment in K14-HPV16 Transgenic Mice: Mast Cell Infiltration and MicroRNA Expression
Source: MDPI journal article supplement (doi:10.3390/cancers14092216), 2022-04-28
Supplement: s1 [file s1]

## Supplementary Materials

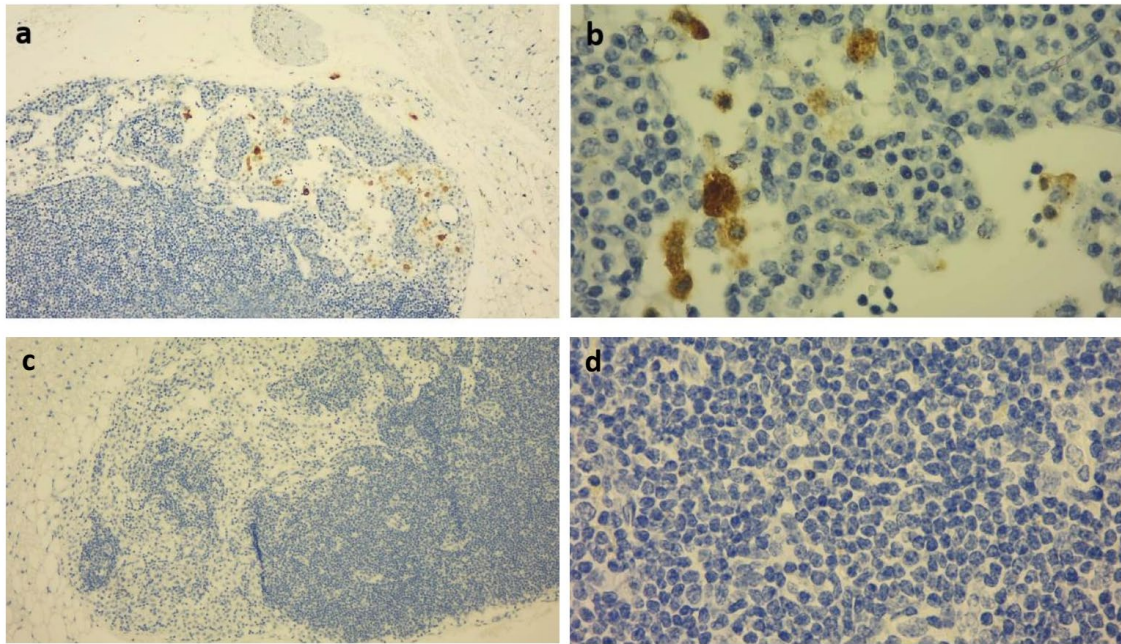

**Figure S1.** Histological analysis of lymph node samples, DAB-hematoxylin. (a). Lymph node with mast cell infiltration observed in mice, 100 $\times$ . (b). Same lymph node from figure a. with high magnification 500 $\times$ . (c). Lymph node without primary antibody, 100 $\times$ . (d). Same lymph node from figure c. with high magnification 500 $\times$ .
